1 **FUCCI tracking shows that Neurog3 levels vary with cell-cycle phase in endocrine-biased**  
2 **pancreatic progenitors**

3 Matthew E. Bechard<sup>1</sup>, Eric D. Bankaitis<sup>1</sup>, Alessandro Ustione<sup>2,3</sup>, David W. Piston<sup>2,3</sup>, Mark A.  
4 Magnuson<sup>1,2</sup> and Christopher V.E. Wright<sup>1\*</sup>

5 <sup>1</sup>Vanderbilt University Program in Developmental Biology, Department of Cell and  
6 Developmental Biology, Vanderbilt Center for Stem Cell Biology, Vanderbilt University School of  
7 Medicine, Nashville, TN; <sup>2</sup>Department of Molecular Physiology and Biophysics, Vanderbilt  
8 University School of Medicine, Nashville, TN; <sup>3</sup>Current address: Cell Biology and Physiology,  
9 Washington University School of Medicine, St. Louis, MO

10 \*Corresponding author. Email: [chris.wright@vanderbilt.edu](mailto:chris.wright@vanderbilt.edu). Fax: +1 615 322 1917

11

12 **Abstract**

13 Neurog3<sup>HI</sup> endocrine-committing cells are generated from a population of Sox9<sup>+</sup> mitotic  
14 progenitors with only a low level of *Neurog3* transcriptional activity (*Neurog3*<sup>TA,LO</sup>). Low-level  
15 Neurog3 protein, in *Neurog3*<sup>TA,LO</sup> cells, is required to maintain their mitotic endocrine-lineage-  
16 primed status. Herein, we describe a *Neurog3*-driven FUCCI cell-cycle reporter (*Neurog3*<sup>P2A,FUCCI</sup>)  
17 derived from a *Neurog3* BAC transgenic reporter that functions as a loxed cassette acceptor  
18 (LCA). In cycling Sox9<sup>+</sup> *Neurog3*<sup>TA,LO</sup> progenitors, the majority of cells in S-G<sub>2</sub>-M phases have  
19 undetectable levels of Neurog3 with increased expression of endocrine progenitor markers,  
20 while those in G<sub>1</sub> have low Neurog3 levels with increased expression of endocrine  
21 differentiation markers. These findings support a model in which variations in Neurog3 protein  
22 levels are coordinated with cell-cycle phase progression in *Neurog3*<sup>TA,LO</sup> progenitors with  
23 entrance into G<sub>1</sub> triggering a concerted effort, beyond increasing Neurog3 levels, to maintain an  
24 endocrine-lineage-primed state by initiating expression of the downstream endocrine  
25 differentiation program prior to endocrine-commitment.

26

## 27 Introduction

28 *Neurogenin3* (*Neurog3*) encodes a bHLH transcription factor essential for endocrine-lineage  
29 specification during mouse pancreas organogenesis (1). *Neurog3* is also critical to human  
30 pancreatic endocrine-cell development, with null mutations causing neonatal diabetes, and  
31 blocking  $\beta$ -cell differentiation from hESC (2). During mouse pancreatic development, high-level  
32 *Neurog3* expression (*Neurog3<sup>HI</sup>*) in Sox9<sup>+</sup> pancreatic epithelial cells causes cell-cycle exit,  
33 endocrine commitment and epithelial delamination (3–6). We recently demonstrated,  
34 however, that low *Neurog3* levels are necessary for maintaining a population of Sox9<sup>+</sup> *Neurog3*-  
35 transcriptionally-active pancreatic epithelial cells in a mitotic endocrine-biased progenitor state  
36 (defined as *Neurog3<sup>TA,LO</sup>*), which pre-empts the transition to an endocrine-committed *Neurog3<sup>HI</sup>*  
37 state (6,7). Our findings presented a significant parallel to how a low level of *Neurog2* promotes  
38 a neural-progenitor state while high levels cause neural differentiation and cell-cycle exit (8–  
39 11). In those studies, higher Cdk activity in rapidly cycling progenitors, which have a relatively  
40 short G<sub>1</sub>, keeps *Neurog2* in a (hyper)-phosphorylated, unstable state that activates neural-  
41 progenitor target genes (10,12). When the cell cycle of neural progenitors lengthens, however,  
42 and G<sub>1</sub> lengthens, Cdk activity decreases, resulting in accumulation of a more stable (hypo)-  
43 phosphorylated *Neurog2* that preferentially activates neural-differentiation targets (10,12).  
44 Recently, we demonstrated that keeping *Neurog3* levels low leads to an increased mitotic index  
45 of *Neurog3<sup>TA,LO</sup>* progenitors and expands their numbers within the pancreatic epithelium (6).  
46 Moreover, time-lapse observations show that the transition from the low level of *Neurog3*  
47 observed in mitotic *Neurog3<sup>TA,LO</sup>* progenitors to the high level necessary for endocrine-  
48 commitment occurs ~3-6 hours after division of the parental *Neurog3<sup>TA,LO</sup>* cell, during G<sub>1</sub> (6).

49 These findings led to our proposal that the level and stability of Neurog3 in mitotic Sox9<sup>+</sup>  
50 *Neurog3*<sup>TA.LO</sup> progenitors is regulated by the cell cycle and that G<sub>1</sub> extension promotes Neurog3  
51 stabilization, accumulation, and endocrine commitment (**13**). Two recent reports support this  
52 model, demonstrating that Neurog3 is targeted and destabilized by Cdks and that G<sub>1</sub>  
53 lengthening, by reducing Cdk activity, causes the accumulation of a more stable  
54 un(der)phosphorylated form of Neurog3 (**14,15**).

55

56 We have been independently investigating if Neurog3 protein stability and progenitor  
57 maintenance vs. endocrine differentiation decisions are connected to cell-cycle progression in  
58 *Neurog3*<sup>TA.LO</sup> progenitors. To do so, we used recombinase-mediated cassette exchange (RMCE)  
59 to replace our previously described *Neurog3*<sup>RG</sup> BAC transgenic reporter – which was designed as  
60 a Loxed Cassette Acceptor (LCA) – with a *Neurog3*-driven single-transgene insert of the Fucci  
61 (Fluorescence Ubiquitin Cell Cycle Indicator) reporter (*Neurog3*<sup>P2A.Fucci</sup>). Our analysis of  
62 *Neurog3*<sup>P2A.Fucci</sup> reporter activity showed that in cycling Sox9<sup>+</sup> *Neurog3*<sup>TA.LO</sup> progenitors,  
63 Neurog3 protein levels are highest during G<sub>1</sub> and lowest during S-G<sub>2</sub>-M. Moreover, Sox9<sup>+</sup>  
64 *Neurog3*<sup>TA.LO</sup> progenitors in early G<sub>1</sub> show increased expression of downstream Neurog3 targets  
65 usually associated with the forward passage into an endocrine commitment and progression  
66 program. We propose that these findings support a model in which the endocrine-  
67 differentiation program is already accessed, or preformed (albeit at a low or incomplete level),  
68 in mitotic *Neurog3*<sup>TA.LO</sup> progenitors prior to moving into endocrine-commitment. This work  
69 provides a new tool for investigating, under *in vivo* conditions, Neurog3 and cell-cycle

70 connections in lineage-primed progenitors, and new insight on the role of Neurog3 in regulating  
71 progenitor maintenance vs endocrine-commitment decisions.

72

## 73 **Results and Discussion**

74

75 ***Generating a Neurog3-driven P2A-fused single transgene FUCCI reporter.*** The FUCCI reporter  
76 relies on cell-cycle-phase-dependent destruction of fluorescent proteins fused to “degradation  
77 boxes” from hGeminin and hCdt, specifically the regions hGem<sup>(1/110)</sup> and hCdt1<sup>(30/120)</sup> (**16**),  
78 allowing cell-cycle phase determination (Figure 1A). To investigate connections between  
79 Neurog3 protein levels and cell-cycle progression in *Neurog3*<sup>TA.LO</sup> progenitors we generated a  
80 single mKO2-hCdt1<sup>(30/120)</sup>-P2A-mVenus-hGem<sup>(1/110)</sup> FUCCI (P2A.FUCCI) cassette, enabling both  
81 FUCCI components to be expressed under the control of *Neurog3* (Figure 1B). We selected the  
82 pairing of mKO2/mVenus because their fluorophores are spectrally separable from GFP and  
83 mCherry, allowing P2A.FUCCI visualization in cells carrying our previously described *Neurog3*-  
84 driven H2B<sup>mCherry</sup>-P2A-GFP<sup>GPI</sup> (*Neurog3*<sup>RG1</sup> reporter) (**6**). As seen with the original FUCCI reporter  
85 (**16**), *CMV*-driven expression of P2A.FUCCI in HeLa cells resulted in mKO2-hCdt1<sup>(30/120)</sup> positivity  
86 during G<sub>1</sub> and mVenus-hGem<sup>(1/110)</sup> positivity during S-G<sub>2</sub>-M, with a brief overlap of the two  
87 fusion proteins during the G<sub>1</sub>/S phase transition (Figure 1B).

88

89 To facilitate generating additional *Neurog3* BAC transgenic reporters from the *Neurog3*<sup>RG</sup>  
90 reporter, we had flanked the *Neurog3*<sup>RG</sup> cassette with tandem *lox71* and *lox2272* sites, making  
91 a Loxed Cassette Acceptor (LCA) allele (see ref. **6**; Figure 2A). This design was to allow  
92 *Neurog3*<sup>RG</sup> to be replaced with any *lox66/lox2272*-flanked cassette via RMCE in mESCs. To avoid

93 potential issues with performing RMCE in cells carrying multiple LCA alleles, mESCs identified as  
94 having stably integrated the *Neurog3*<sup>RG</sup> BAC LCA transgene were screened for single-copy  
95 insertion by a qPCR-based assay (see methods and materials; Figure 2B and C) that accurately  
96 estimates transgene copy number (17). Using this assay, two mESC transgenic clones, referred  
97 to as *Neurog3*<sup>RG1</sup> and *Neurog3*<sup>RG2</sup>, were identified as having copy numbers of  $1.25 \pm 0.16$  and  
98  $1.46 \pm 0.26$  (Figure 2C). Derivation of *Neurog3*<sup>RG</sup> mESC lines and the subsequent *Neurog3*<sup>RG1</sup>  
99 mouse line are described in (6). As with the *Neurog3*<sup>RG1</sup> mouse (6), examination, in *Neurog3*<sup>RG2</sup>  
100 mice, of gross tissue and islet architecture, ad libitum fed glucose levels, and proportions of  
101 Sox9<sup>+</sup> *Neurog3* protein-low (*Neurog3*<sup>PL0</sup>) versus Sox9<sup>-</sup> *Neurog3* protein-high (*Neurog3*<sup>PHI</sup>) cells  
102 during pancreas development, revealed no abnormal phenotype (Figure 2-figure supplement  
103 1A-D; data not shown). We next validated the LCA function of the *Neurog3*<sup>RG</sup> BAC transgene by  
104 using the *Neurog3*<sup>RG2</sup> mESC line to derive a *Neurog3*<sup>P2A.FUCCI</sup> mESC line. A lox66/lox2272-flanked  
105 *Neurog3*<sup>P2A.FUCCI</sup>-PGK-hygro<sup>R</sup> cassette was generated with cassette placement mimicking that of  
106 *Neurog3*<sup>RG</sup> (Figure 2-figure supplement 2A). Following RMCE in *Neurog3*<sup>RG2</sup> mESCs, PCR was  
107 performed to verify replacement of the lox71/lox2272-flanked *Neurog3*<sup>RG</sup>-PGK-Puro<sup>ATK</sup> cassette  
108 with the lox66/lox2272 *Neurog3*<sup>P2A.FUCCI</sup>-PGK-hygro<sup>R</sup> cassette (Figure 2-figure supplement 2B).  
109 This derivative *Neurog3*<sup>P2A.FUCCI</sup> mESC line was then used to generate *Neurog3*<sup>P2A.FUCCI</sup> transgenic  
110 mice. Given that the genomic integration site is likely different in *Neurog3*<sup>RG2</sup> vs. *Neurog3*<sup>RG1</sup>  
111 mESC lines, we used *Neurog3*<sup>RG2</sup> mESCs to derive *Neurog3*<sup>P2A.FUCCI</sup> mice to allow future breeding  
112 of *Neurog3*<sup>P2A.FUCCI</sup> to *Neurog3*<sup>RG1</sup> mice to enable four-color reporting of cell-cycle phase and  
113 *Neurog3* expression. Our proposal is that such visualization could facilitate experiments aimed  
114 at understanding if, like other progenitor populations, G<sub>1</sub> length or overall cell-cycle length in

115 mitotic *Neurog3*<sup>TA.LO</sup> progenitors plays a role in regulating progenitor maintenance vs.  
116 endocrine-commitment decisions, or even in determining whether one endocrine cell-type is  
117 produced over another at specific stages or locations within the developing pancreas.

118

119 ***Neurog3 levels and progenitor maintenance vs. endocrine-commitment decisions are coupled***

120 ***to the cell cycle.*** Recent studies showed that during S-G<sub>2</sub>-M, Neurog3 is kept in a

121 hyperphosphorylated unstable state via Cdk phosphorylation, and that decreased Cdk activity

122 associated with entrance into G<sub>1</sub> result in stabilization and accumulation (14,15). These findings

123 support our model that, in actively cycling *Neurog3*<sup>TA.LO</sup> progenitors, Neurog3 protein levels

124 vary according to the cell-cycle phase (13). To address this issue, we used *Neurog3*<sup>P2A.FUCCI</sup>

125 reporter expression in *Neurog3*<sup>TA.LO</sup> progenitors to track cell-cycle progression in relation to

126 Neurog3 protein levels. Previously, *Neurog3*<sup>TA.LO</sup> progenitors were defined as a population of

127 Sox9<sup>+</sup> *Neurog3*-transcriptionally active (low-level *Neurog3*<sup>RG1</sup> reporter expression) progenitors

128 comprising cells with either low (*Neurog3*<sup>TA.pLO</sup>) or immunologically undetectable Neurog3

129 (*Neurog3*<sup>TA.pUD</sup>) (6). Consistent with this definition, *Neurog3*<sup>TA.LO</sup> progenitors were herein

130 defined as Sox9-positive and positive for either component of the *Neurog3*<sup>P2A.FUCCI</sup> reporter,

131 with low or undetectable Neurog3 protein, whereas endocrine-committed *Neurog3*<sup>TA.HI</sup> cells

132 should be Sox9-negative, Neurog3<sup>pHI</sup> and positive for mKO2-hCdt1<sup>(30/120)</sup> (Figure 3A).

133 Unexpectedly, we detected significant residual cytoplasmic mVenus-hGem<sup>(1/110)</sup> fluorescence in

134 post-mitotic, actively delaminating, endocrine-committed *Neurog3*<sup>TA.HI</sup> cells that showed the

135 expected high mKO2-hCdt1<sup>(30/120)</sup> signal (Figure 3A). This observation was different from

136 previous reports on the FUCCI reporter, where mVenus-hGem<sup>(1/110)</sup> was mostly degraded after

137 M-phase, becoming absent by the time of mKO2-hCdt<sup>(30/120)</sup> detection in early G<sub>1</sub> (**16,18**). This  
138 cytoplasmic mVenus-hGem<sup>(1/110)</sup> signal, however, was completely absent in islets (data not  
139 shown), which could suggest that high *Neurog3*<sup>P2A.FUCCI</sup> reporter expression in delaminating  
140 *Neurog3*<sup>TA.HI</sup> cells overwhelms the ubiquitin-mediated protein degradation pathway, extending  
141 the time necessary to fully degrade mVenus-hGem<sup>(1/110)</sup> after entering G<sub>1</sub>. We were therefore  
142 careful to score *Neurog3*<sup>P2A.FUCCI</sup> cells as only in S-G<sub>2</sub>-M if definitively nuclear mVenus signal was  
143 observed, with no indication of mKO2 (Figure 3A). By these criteria, the majority of Sox9<sup>+</sup>  
144 *Neurog3*<sup>TA.LO</sup> cells were in S-G<sub>2</sub>-M and thus mitotic, while nearly all *Neurog3*<sup>TA.HI</sup> cells were in G<sub>1</sub>  
145 (Figure 3B). To determine if Neurog3 protein levels vary through the cell cycle, we examined  
146 the cell-cycle status of Sox9-positive *Neurog3*<sup>TA.pLO</sup> versus *Neurog3*<sup>TA.pUD</sup> cells. Quantification  
147 revealed that 78% (± 8.1%) of *Neurog3*<sup>TA.pUD</sup> cells were in S-G<sub>2</sub>-M and 22% (± 8.1%) in G<sub>1</sub> (Figure  
148 3B). Although stabilization and accumulation of Neurog3 occurs during G<sub>1</sub>, previous work  
149 showed that Neurog3 protein is present during S phase, with rapid degradation occurring  
150 during G<sub>2</sub>-M (**14**). Corroborating that result, we show that while the majority (55% ± 3.6%) of  
151 Sox9<sup>+</sup> *Neurog3*<sup>TA.pLO</sup> cells were in G<sub>1</sub>, 45% (± 3.6%) were in S-G<sub>2</sub>-M (Figure 3B). These findings  
152 show that the Neurog3 protein level in cycling Sox9<sup>+</sup> *Neurog3*<sup>TA.LO</sup> progenitors is lowest during  
153 S-G<sub>2</sub>-M and highest during G<sub>1</sub>.

154

155 Previous work shows that a low Neurog3 protein level maintains a mitotic, endocrine lineage-  
156 primed progenitor state (**1,4–7**). Given the cell-cycle-dependent variation of Neurog3 protein  
157 level, we hypothesized that the low-level accumulation of Neurog3 in *Neurog3*<sup>TA.LO</sup> progenitors  
158 in G<sub>1</sub> could trigger gene expression changes that were consistent with endocrine lineage-



159 priming, and involving genes other than solely *Neurog3*. Therefore, intraepithelial  
160 *Neurog3*<sup>P2A.FUCCI+</sup> cells (*Neurog3*<sup>TA.LO</sup> progenitors) were isolated from E14.5 *Neurog3*<sup>P2A.FUCCI</sup>  
161 pancreatic explants by flow sorting of lumen-contacting (Muc1<sup>+</sup>) cells, then sorting cells in S-G<sub>2</sub>-  
162 M (mKO2<sup>-</sup> mVenus<sup>+</sup>) or G<sub>1</sub> (mKO2<sup>+</sup> mVenus<sup>-</sup>) (Figure 4A). As described above, actively  
163 delaminating *Neurog3*<sup>TA.HI</sup> cells display relatively bright, yet to be degraded, cytoplasmic  
164 mVenus and high nuclear mKO2 (Figure 3A). To exclude this population, the flow-cytometry  
165 gating was set so that mVenus/mKO2 co-positive cells were not collected (Figure 4A). Analysis  
166 via qRT-PCR showed that while in S-G<sub>2</sub>-M, *Neurog3*<sup>TA.LO</sup> progenitors are enriched for *Sox9* and  
167 *Hes1* (mitotic endocrine-progenitor markers) with low expression of *Neurog3* and several  
168 markers indicating forward progression towards endocrine commitment and further  
169 differentiation (*NeuroD1*, *Insm1*, *Glucagon*, *Insulin*) (Figure 4B). *Neurog3*<sup>TA.LO</sup> progenitors in G<sub>1</sub>,  
170 however, showed significantly decreased *Hes1* and increased *Neurog3*, *NeuroD1*, *Insm1*,  
171 *Glucagon* and *Insulin* (Figure 4B). Despite the increases in endocrine-commitment markers,  
172 entrance into G<sub>1</sub> did not significantly alter *Sox9* expression (Figure 4B), demonstrating that  
173 these cells are intraepithelial *Neurog3*<sup>TA.LO</sup> progenitors. The data are also consistent with the  
174 idea that cells in this mitotic progenitor state, when in G<sub>1</sub>, initiate expression of several genes  
175 representing the downstream endocrine differentiation program, at a stage prior to  
176 commitment. Given the role of *Neurog3* in trans-activating *NeuroD1* and *Insm1* (19–21), we  
177 speculate that the low-level accumulation of *Neurog3* specifically in G<sub>1</sub> could be sufficient to  
178 induce low-level *NeuroD1/Insm1* expression in lineage-primed progenitors. It is also possible  
179 that signals initiating the lineage-primed state activate low-level expression of other  
180 transcription-factor genes in a *Neurog3*-independent manner. It is plausible that the concerted

181 expression of several trans-acting factors establishes a relatively weak or incomplete form of  
182 the GRN that is normally considered to work only in post-mitotic committed cells. It would be  
183 important to discover if entrance into G<sub>1</sub> were also linked to alterations in chromatin  
184 architecture and DNA accessibility that allow low-level expression of GRN member genes  
185 contributing to lineage priming in *Neurog3*<sup>TA.LO</sup> progenitors. Understanding how cell-cycle  
186 progression regulates such gene expression programs could lead to understanding if the final  
187 hormone-secreting cell fate might become preconditioned in the mitotic lineage-biased stage,  
188 and possibly how to manipulate cells at this early phase of their lifespan to improve the  
189 generation of functional endocrine cells.

190

191

**A**

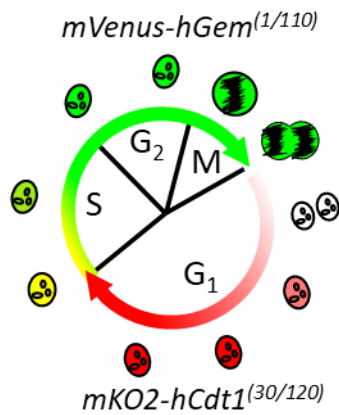

**B**

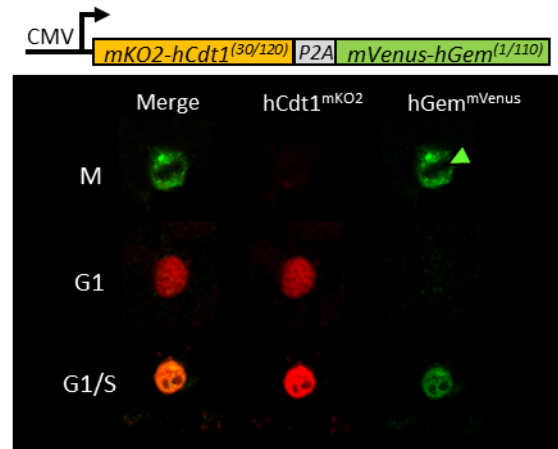

192

193 **Figure 1:** Peptide-2A single-transgene FUCCI transgene. (A) Diagram (adapted from Sakaue-Sawano et  
194 al., 2008) indicating phases of the cell cycle marked by the components of the FUCCI reporter: mVenus-  
195 hGem<sup>(1/110)</sup> (S-G<sub>2</sub>-M) and mKO2-hCdt1<sup>(30/120)</sup> (G<sub>1</sub>). (B) *Top*, Diagram of CMV<sup>P2A.FUCCI</sup> expression plasmid.  
196 *Bottom*, Immunofluorescence images showing CMV<sup>P2A.FUCCI</sup> reporter expression in HeLa cells at  
197 appropriate stages of the cell cycle. Green arrowhead indicates mitotic chromosomes.

198

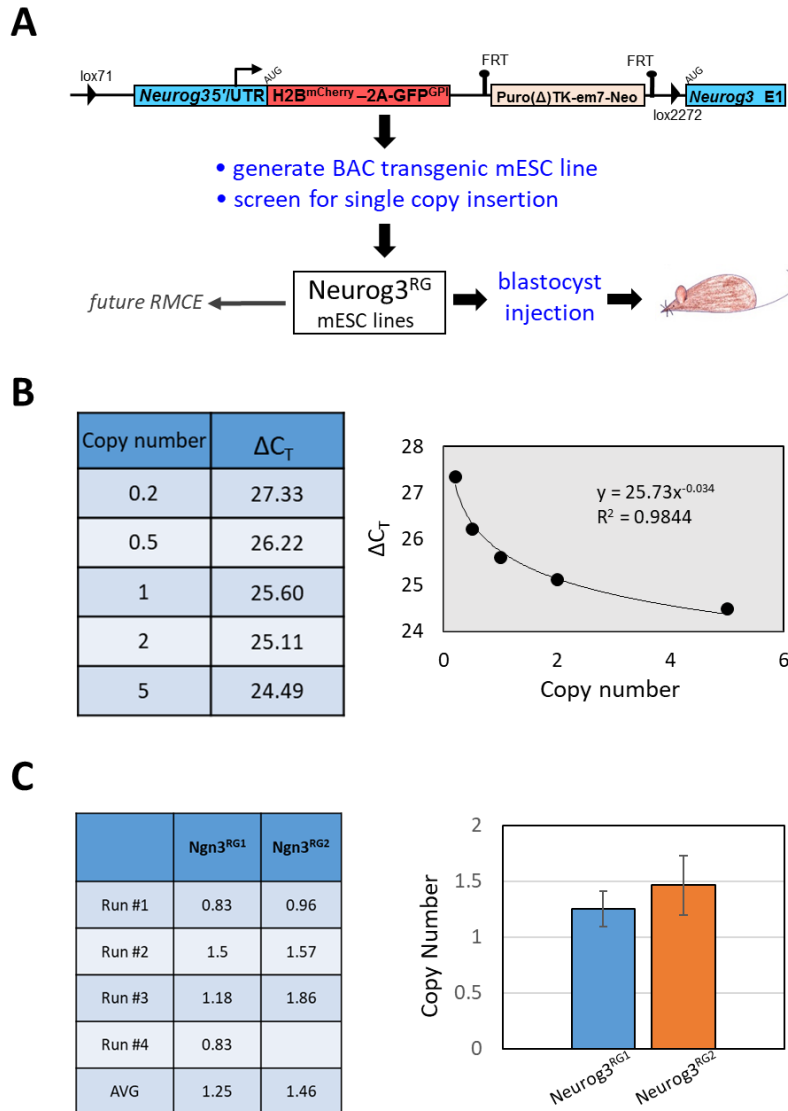

199

200 **Figure 2:** Generation of an LCA-capable BAC transgenic *Neurog3*<sup>RG</sup> mESC line. (A) Schematic detailing the  
 201 generation of transgenic mES cell lines carrying a single copy of a *Neurog3*<sup>RG</sup> BAC transgene designed to  
 202 serve as an LCA in future RMCE reactions. The *Neurog3*<sup>RG</sup> BAC transgenic mESCs were previously used to  
 203 generate *Neurog3*<sup>RG</sup> reporter mice (6). *Neurog3* 5'/UTR represents the region 5' of the start codon  
 204 containing cis regulatory elements and the *Neurog3* 5' untranslated region (UTR). (B) Table and graph of  
 205 a standard curve, generated via a qPCR-based assay (see methods and materials), that relates transgene  
 206 copy number to a specific  $\Delta C_T$  value. (C) Table and graph depicting the estimated *Neurog3*<sup>RG</sup> BAC  
 207 transgene copy number present in *Neurog3*<sup>RG1</sup> and *Neurog3*<sup>RG2</sup> mESC lines.

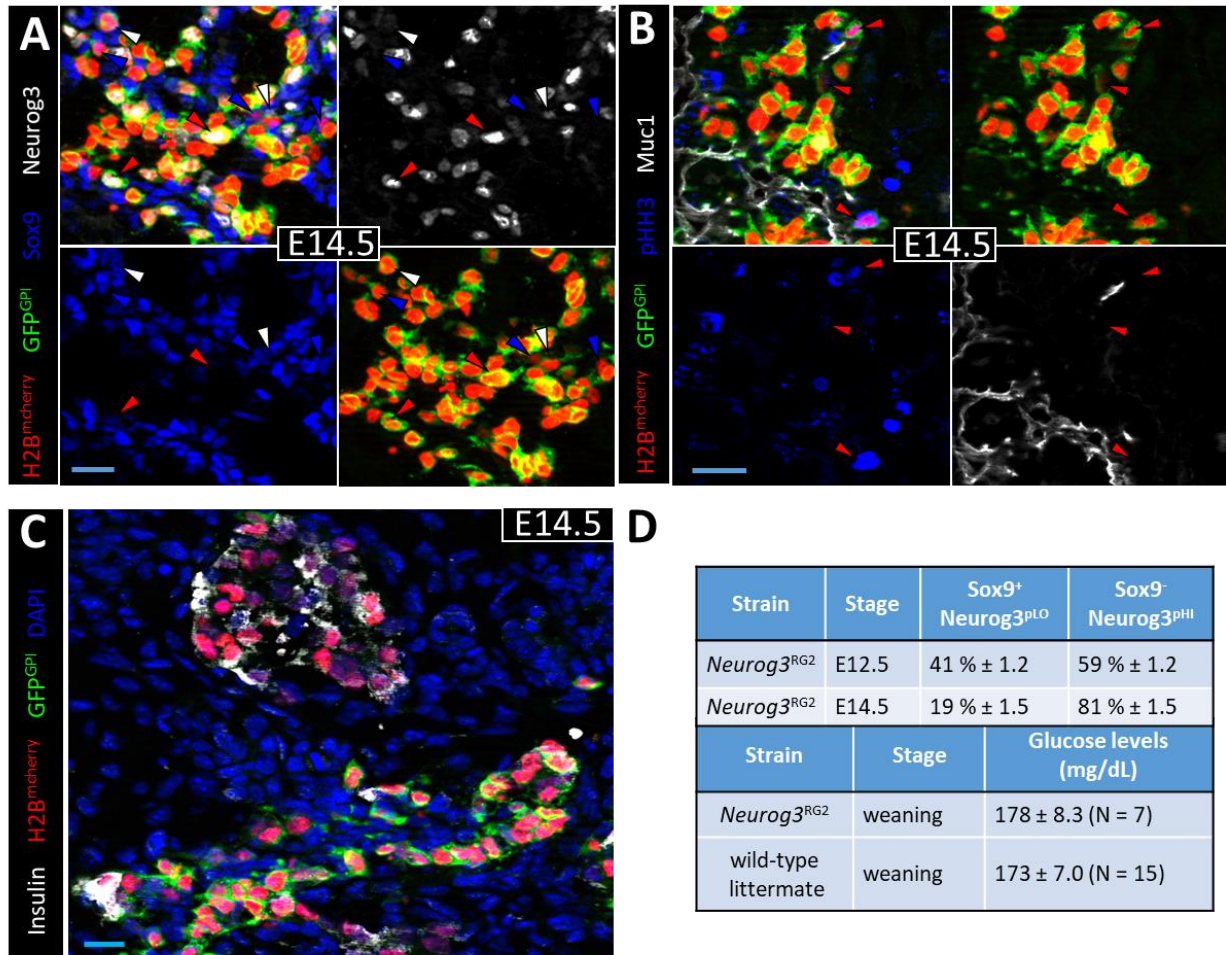

208

209 **Figure Supplement 1: *Neurog3*<sup>RG2</sup> BAC transgenic reporter is a passive reporter.** (A) E14.5 pancreatic  
 210 epithelium showing H2B<sup>mCherry</sup>, GFP<sup>GPI</sup>, Sox9 and Neurog3. Blue, white and red arrowheads indicate Sox9<sup>+</sup>  
 211 *Neurog3*<sup>TA.pUD</sup> cells, Sox9<sup>+</sup> *Neurog3*<sup>TA.pLO</sup> cells and Sox9<sup>-</sup> *Neurog3*<sup>TA.HI</sup> cells, respectively. (B) E14.5  
 212 pancreatic epithelium showing H2B<sup>mCherry</sup>, GFP<sup>GPI</sup>, Muc1, and phospho-Histone H3 (pHH3). Red  
 213 arrowheads indicate pHH3<sup>+</sup> Muc1<sup>+</sup> *Neurog3*<sup>TA.LO</sup> cells. (C) Image of Islets of Langerhans and the  
 214 pancreatic epithelium at E14.5 showing H2B<sup>mCherry</sup>, GFP<sup>GPI</sup>, Insulin and DAPI. (D) Top table details  
 215 percentage of Sox9<sup>+</sup> Neurog3<sup>pLO</sup> vs. Sox9<sup>-</sup> Neurog3<sup>pHI</sup> cells in *Neurog3*<sup>RG2+</sup> pancreatic epithelium at e12.5  
 216 and e14.5, which are unchanged relative to typical analyses of pancreata from wild-type mice (5).  
 217 Bottom table details blood glucose levels, measured in whole blood using a Nova Max Plus glucose  
 218 meter and test strips, of ad libitum fed wild-type and *Neurog3*<sup>RG2+</sup> mice at weaning (~P21). Bars, 20 μm.

**A**

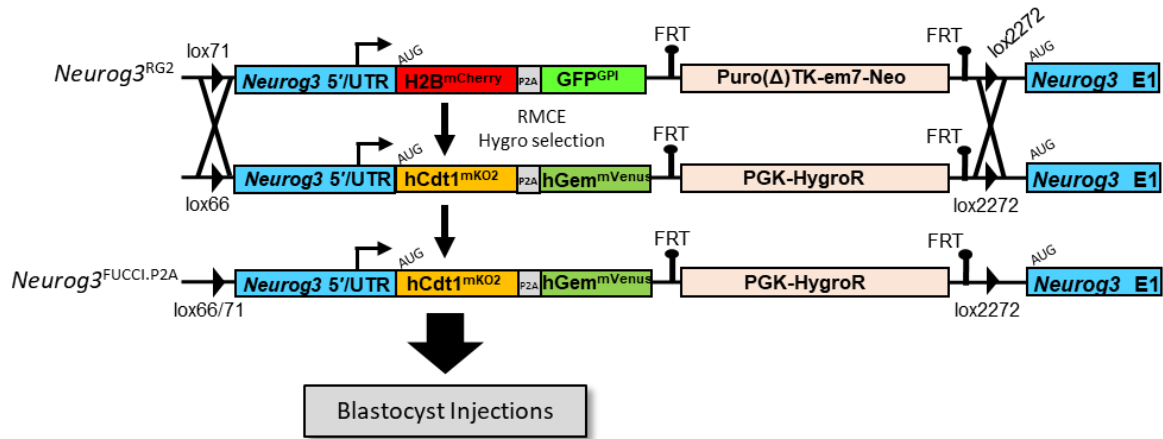

**B**

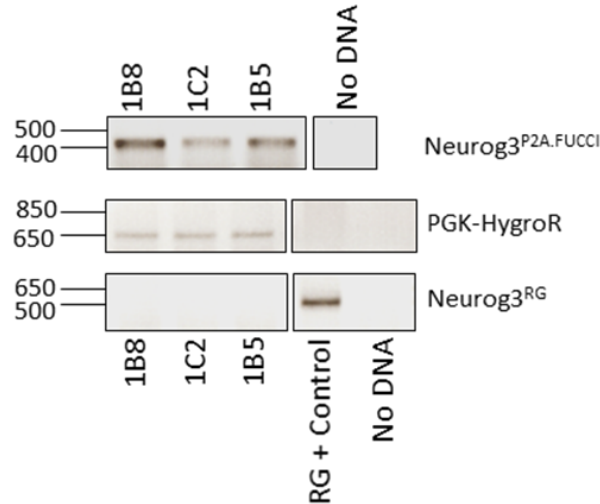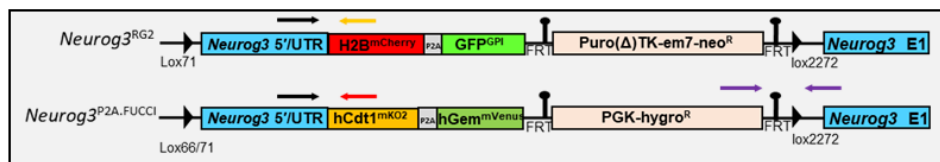

219

220 **Figure Supplement 2: RMCE-mediated derivation of *Neurog3*<sup>P2A.FUCCI</sup> mESC line.** (A) Scheme for using  
 221 RMCE to replace the LCA-capable *Neurog3*<sup>RG</sup> BAC transgenic reporter with the Lox66/lox2272-flanked  
 222 *Neurog3*<sup>P2A.FUCCI</sup> transgenic reporter. (B) Top, PCR of genomic DNA from three mES cell lines (1B8, 1C2,  
 223 1B5) to check for successful RMCE of the lox71/lox2272-flanked *Neurog3*<sup>RG</sup> cassette in *Neurog3*<sup>RG2</sup>  
 224 mESCs for the lox66/lox2272-flanked *Neurog3*<sup>P2A.FUCCI</sup> cassette. Bottom, schematic showing the  
 225 approximate binding sites for the *Neurog3*<sup>RG</sup>, *Neurog3*<sup>P2A.FUCCI</sup> and PGK-hygro<sup>R</sup> primer pairs.

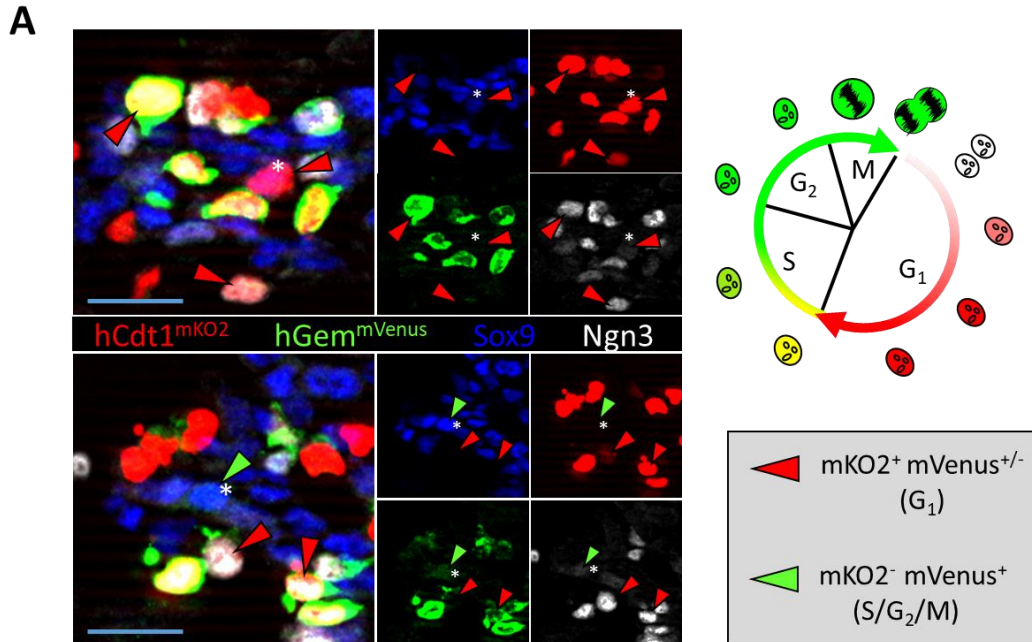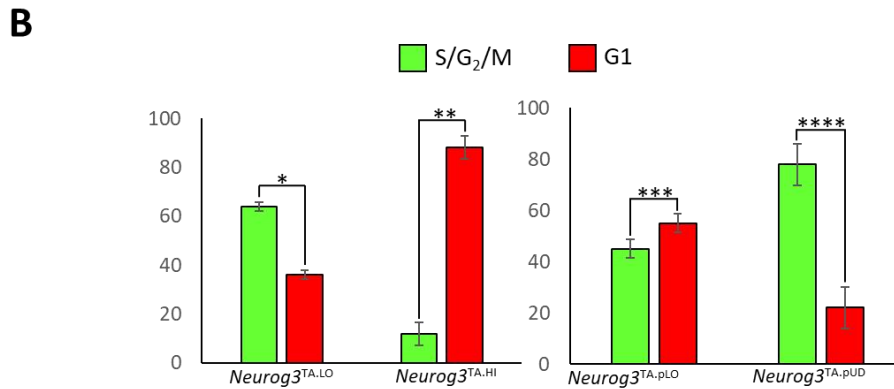

226

227 **Figure 3:** Neurog3 protein levels vary according to cell-cycle phase. (A) E14.5 pancreatic epithelium

228 showing Sox9, Neurog3, hCdt1<sup>mKO2</sup> and hGem<sup>mVenus</sup>. Red arrowheads indicate Neurog3<sup>P2A.FUCCI+</sup> cells that

229 are mKO2<sup>+</sup> and thus in G<sub>1</sub>, green arrowheads indicate Neurog3<sup>P2A.FUCCI+</sup> cells that are mVenus<sup>+</sup> and thus in

230 S-G<sub>2</sub>-M phase. Asterisk indicates Sox9<sup>+</sup> Neurog3<sup>TA,LO</sup> cells, arrows with no asterisk indicate Sox9<sup>-</sup>

231 Neurog3<sup>TA,HI</sup> cells. (B) Left, percentage of Sox9<sup>+</sup> Neurog3<sup>TA,LO</sup> and Sox9<sup>-</sup> Neurog3<sup>TA,HI</sup> cells in S-G<sub>2</sub>-M versus

232 G<sub>1</sub> phase. Right, percentage of Sox9<sup>+</sup> Neurog3<sup>TA,pLO</sup> and Sox9<sup>+</sup> Neurog3<sup>TA,pUD</sup> in S-G<sub>2</sub>-M versus G<sub>1</sub> phase. (*n*

233 = 1600, *N* = 3). (\*) *P* = 0.0072; (\*\*) *P* = 4 × 10<sup>-6</sup>; (\*\*\*) *P* = 0.0607; (\*\*\*\*) *P* = 0.0039. Data are mean ± SEM.

234 Bars, 20 μm.

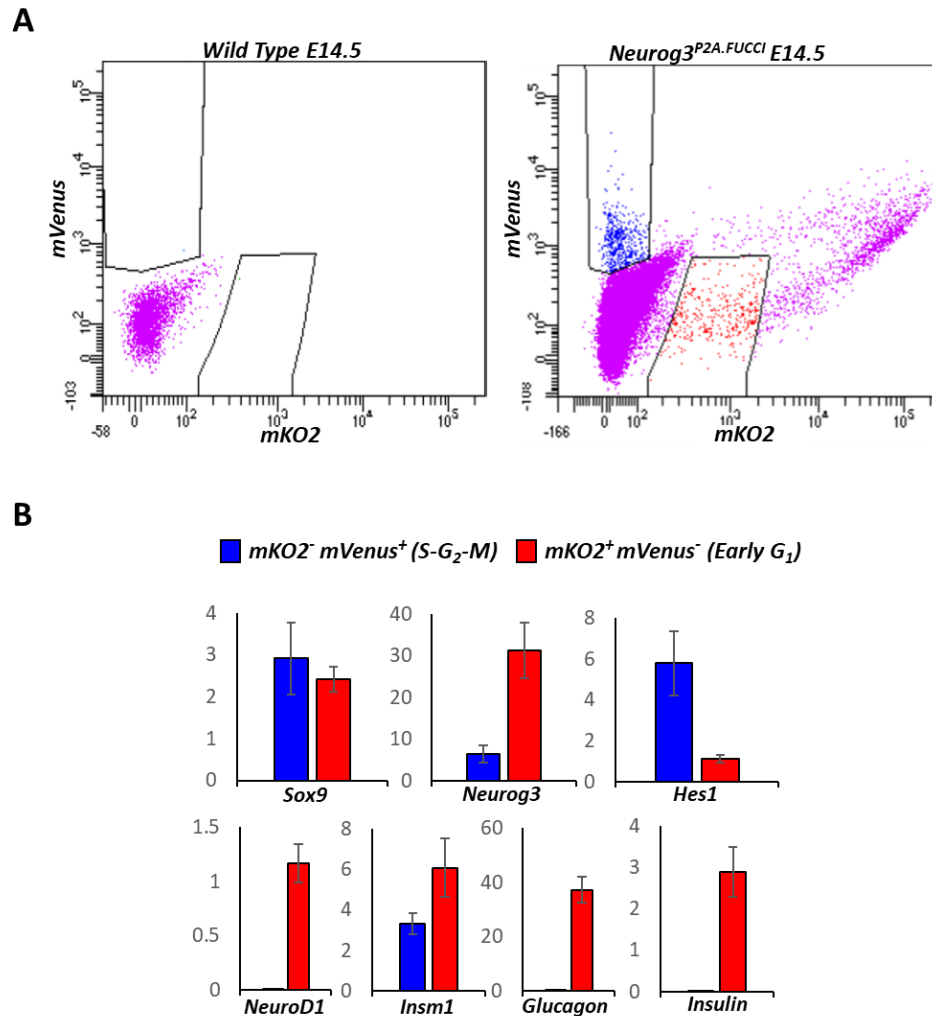

235

236 **Figure 4:** Neurog3 promotes low-level activation of downstream targets during G<sub>1</sub> in the mitotic

237 *Neurog3*<sup>TA,LO</sup> progenitor state. (A) flow cytometry plot detailing capture of lumen-apposed (Muc1<sup>+</sup>)

238 *Neurog3*<sup>P2A.FUCCI+</sup> cells in S-G<sub>2</sub>-M (mKO2<sup>-</sup> mVenus<sup>+</sup>) (Blue population) or G<sub>1</sub> (mKO2<sup>+</sup> mVenus<sup>-</sup>) (red

239 population) from E14.5 *Neurog3*<sup>P2A.FUCCI</sup> pancreata. Flow-sorted cells were collected into TRIzol for RNA

240 isolation and cDNA synthesis. (B) Relative expression level (y-axis), normalized to *Gapdh*, of *Sox9*,

241 *Neurog3*, *Hes1*, *NeuroD1*, *Insm1*, *glucagon*, and *Insulin* for E14.5 flow captured Muc1<sup>+</sup> *Neurog3*<sup>P2A.FUCCI+</sup>

242 mKO2<sup>-</sup> mVenus<sup>+</sup> (blue bars) and Muc1<sup>+</sup> *Neurog3*<sup>P2A.FUCCI</sup> mKO2<sup>+</sup> mVenus<sup>-</sup> (red bars) cells. Each data point

243 represents an average of at least three technical replicates. Error bars are SEM. See supplemental

244 table 1 for a list of primers used.



245 **Supplemental Table 1.** Primers used for genotyping and qRT-PCR analyses.

| <b>Genotyping Primers</b>       |                              |                                |                               |
|---------------------------------|------------------------------|--------------------------------|-------------------------------|
| <b>Target</b>                   | <b>Primer name</b>           | <b>Sequence</b>                |                               |
| <b>Ngn3<sup>RG2</sup></b>       | H2BFv3                       | 5'-GAGGCTCAGCTATCCACTGC-3'     |                               |
|                                 | H2BRv3                       | 5'-GAATTCATGATGCCCATGGC-3'     |                               |
| <b>Ngn3<sup>P2A.FUCCI</sup></b> | H2BFv3                       | 5'-GAGGCTCAGCTATCCACTGC-3'     |                               |
|                                 | FUCCI-R3                     | 5'-GGCTTATATGCGCACTGAC-3'      |                               |
| <b>HygroR</b>                   | pHyS6                        | 5'-CCGATGGCTGTGTAGAAGTACTCG-3' |                               |
|                                 | P1FNR                        | 5'-GATGGTGAGCGCATCCAAG-3'      |                               |
| <b>qRT-PCR Primers</b>          |                              |                                |                               |
| <b><i>GAPDH</i></b>             | 5'-ACTTTGGCATTGTGGAAGG-3'    | <b><i>Glucagon</i></b>         | 5'-ACATCTCGTGCCAGTCACTT-3'    |
|                                 | 5'-GGATGCAGGGATGATGTTCT-3'   |                                | 5'-CGTTGGGTTACACAATGCT-3'     |
| <b><i>Sox9</i></b>              | 5'-CTCCCCCTTTCTTTGTTGTTT-3'  | <b><i>Hes1</i></b>             | 5'-TAGCCACCTCTCTTCTGAC-3'     |
|                                 | 5'-TCTGAAACCTCTCATTTGTCCA-3' |                                | 5'-CAGTGCATGGTCAGTCACTTAAT-3' |
| <b><i>Ngn3</i></b>              | 5'-CAGGGTTTCTGAGCTTCTCC-3'   | <b><i>Insulin</i></b>          | 5'-CAGCAAGCAGGTCATTGTTT-3'    |
|                                 | 5'-GGGAAGGGTAACGACTTGAA-3'   |                                | 5'-GGGACCACAAAGATGCTGTT-3'    |
|                                 |                              | <b><i>NeuroD1</i></b>          | 5'-GAAGATTGATCCGTGGCTTT-3'    |
|                                 |                              |                                | 5'-CAGCATCAATGGCAACTTCT-3'    |

246

247

248

249

250

251

252

253

254 **Supplemental Table 2.** Antibodies and detection methods.

| Primary Antibodies          |              |          |                           |                    |
|-----------------------------|--------------|----------|---------------------------|--------------------|
| Antigen                     | Species      | Dilution | Label Method              | Source             |
| Muc1                        | Hamster      | 1:250    | IF                        | NeoMarkers         |
| Sox9                        | Rabbit       | 1:2500   | IF                        | Millipore          |
| Neurog3                     | Goat         | 1:40,000 | IF                        | G. Gu (Vanderbilt) |
| pHH3                        | Rabbit       | 1:500    | IF                        | Millipore          |
| EGFP/Venus                  | Rabbit       | 1:500    | IF                        | Clontech<br>Aves   |
|                             | Chicken      | 1:500    | IF                        |                    |
| Insulin                     | Guinea Pig   | 1:500    | IF                        | Dako               |
| DAPI                        | ----         | ----     | Mount Media               | Life Technologies  |
| Secondary Antibodies        |              |          |                           |                    |
| Antigen                     | Conjugation  | Dilution | Source                    |                    |
| Rabbit/Chicken              | Cy2          | 1:250    | Jackson<br>ImmunoResearch |                    |
| Guinea pig/ Goat<br>Hamster | Cy5          | 1:250    | Jackson<br>ImmunoResearch |                    |
| Rabbit                      | 405          | 1:250    |                           |                    |
| Goat                        | Biotinylated | 1:250    | Vector Laboratories       |                    |

255

256

257

258

259 **Materials and Methods**

260

261 **Mice and transgene copy number analysis**

262 Animal protocols were approved by the Vanderbilt University Institutional Animal Care and Use  
263 Committee. All animals were PCR genotyped. Sequences for genotyping primers are listed in  
264 Supplemental Table 1. Generation of the *Neurog3*<sup>RG</sup> BAC transgene and subsequent derivation  
265 of the *Neurog3*<sup>RG2</sup> mESC line and *Neurog3*<sup>RG2</sup> reporter mice was described previously (6).  
266 Although not previously reported in (6), mouse ES cells that stably integrated the *Neurog3*<sup>RG</sup>  
267 BAC LCA were analyzed by a qPCR-based assay that accurately estimates transgene copy  
268 number (17). Briefly, we generated primers specific for the puromycin-resistance gene (Puro<sup>R</sup>)  
269 in the Puro<sup>R</sup>- $\Delta$ TK-em7-Neo<sup>R</sup> (Puro <sup>$\Delta$ TK</sup>) selection cassette in the *Neurog3*<sup>RG</sup> transgene (Figure 2A).  
270 Quantitative PCR was run on 2.5, 10, 20, 40 and 200 ng of genomic DNA from a TL1 mESC  
271 knock-in line, carrying one copy of the Puro <sup>$\Delta$ TK</sup> cassette inserted via homologous recombination,  
272 to yield a  $\Delta$ C<sub>T</sub> curve reflecting copy number (Figure 2B). Triplicate runs of exactly 20 ng of DNA  
273 from 23 candidate *Neurog3*<sup>RG</sup> mESC lines used the standard curve to define copy number.

274

275 **Generation of P2A.FUCCI transgene and the *Neurog3*<sup>P2A.FUCCI</sup> reporter mouse line**

276 To generate the mKO2-hCdt1<sup>(30/120)</sup>-P2A-mVenus-hGem<sup>(1/110)</sup> (P2A.FUCCI) cassette, mKO2-  
277 hCdt1<sup>(30/120)</sup> and mVenus-hGem<sup>(1/110)</sup> were PCR-amplified from plasmids provided by Dr. Atsushi  
278 Miyawaki (RIKEN Brain Science Institute) (Sakaue-Sawano et al. 2008). Amplification of mKO2-  
279 hCdt1<sup>(30/120)</sup> involved attaching a 40 bp *Neurog3* homology region 5' of the mKO2 start codon  
280 along with the first 25 base pairs of a P2A sequence 3' of mKO2. Amplification of mVenus-

281 hGem<sup>(1/110)</sup> involved attaching a 5' BamHI site and a 3' Apal site. A third PCR was used to  
282 generate a P2A cassette with 25 base pairs of the 3' end of mKO2-hCdt1<sup>(30/120)</sup> attached to its 5'  
283 end and a BamHI site at its 3' end. The resulting mKO2-hCdt1<sup>(30/120)</sup> and P2A amplicons were  
284 then fused together by overlap extension PCR (22), using a forward primer specific for the  
285 mKO2-hCdt1<sup>(30/120)</sup> amplicon and a reverse primer specific for the P2A amplicon. The resulting  
286 mKO2-hCdt1<sup>(30/120)</sup>-P2A amplicon was attached to the mVenus-hGem<sup>(1/110)</sup> amplicon via the  
287 BamHI site and inserted into a pBS KS(-) vector. The resulting P2A.FUCCI cassette was removed  
288 from pBS KS (-) and inserted into a pCMV5 vector with a PGK-neomycin selection cassette for  
289 expression in HeLa cells (described below). The P2A.FUCCI cassette was also inserted in place of  
290 the RG cassette in the PL451-RG-FRT-Puro<sup>R</sup>-ΔTK-em7-Neo<sup>R</sup>-FRT-lox2272 vector described  
291 previously (6). Using BAC recombineering the resulting P2A.FUCCI-FRT-Puro<sup>R</sup>-ΔTK-em7-Neo<sup>R</sup>-  
292 FRT-lox2272 cassette was inserted immediately upstream of the Neurog3 start codon in the  
293 Neurog3-containing RPCI-23-121F10 BAC (6). Using BAC recombineering, the P2A.FUCCI-FRT-  
294 Puro<sup>R</sup>-ΔTK-em7-Neo<sup>R</sup>-FRT-lox2272 cassette was retrieved into a vector containing a lox66 site in  
295 a manner that ensured that placement of the lox66 site precisely mimicked that of its lox71  
296 counterpart in the lox71/lox2272 flanked *Neurog3*<sup>RG</sup> BAC LCA. Subsequently, the FRT-flanked  
297 Puro<sup>R</sup>-ΔTK-em7-Neo<sup>R</sup> cassette was replaced with an FRT-flanked PGK-Hygro<sup>R</sup> selection cassette.  
298 This final lox66/lox2272 flanked *Neurog3*<sup>P2A.FUCCI</sup> exchange plasmid was linearized and used to  
299 replace, via RMCE, the *Neurog3*<sup>RG</sup> BAC LCA in the *Neurog3*<sup>RG2</sup> mESC line. Successful replacement  
300 with *Neurog3*<sup>P2A.FUCCI</sup> was verified by PCR (Figure Supplement 2B). A single, verified,  
301 *Neurog3*<sup>P2A.FUCCI</sup> mES cell line was expanded, karyotyped and injected into blastocyst-stage  
302 embryos to derive the *Neurog3*<sup>P2A.FUCCI</sup> reporter mouse strain. The LCA capability of the

303 *Neurog3*<sup>RG1</sup> mESC line was also tested and shown to allow efficient RMCE of lox66/lox2272  
304 flanked cassettes (data not shown).

305

### 306 **Cell culture**

307 HeLa cells were cultured on tissue culture grade plastic at 37° C in Dulbecco's Modified Eagle  
308 Medium (DMEM) supplemented with 10% fetal bovine serum (FBS), and 100 U/mL penicillin-  
309 streptomycin. Cells were passaged by adding 0.05% trypsin-EDTA to a plate of semi-confluent  
310 (<90%) cells. To test expression of the P2A.FUCCI reporter, HeLa cells were transiently  
311 transfected with the *CMV*<sup>P2A.FUCCI</sup> expression plasmid using Lipofectamine 2000 (Thermo Fisher)  
312 according to manufacturer's instructions. The same conclusions were obtained with stable  
313 clonal lines expressing *CMV*<sup>P2A.FUCCI</sup> selected for neomycin resistance over 14 days (not shown).

314

### 315 **Immunodetection**

316 E14.5 dorsal pancreata were fixed in 4% paraformaldehyde (4 hrs, 4°C) then equilibrated in 30%  
317 sucrose overnight at 4°C). A Leica CM3050S was used sucrose-equilibrated, OCT-embedded  
318 tissue (Tissue-Tek) into 10 µm tissue sections, sequentially placed on three separate sets of  
319 slides, each covering ~33% of the dorsal pancreas. Primary and Secondary antibodies are listed  
320 in Supplemental Table 2. All images are epifluorescence from a Zeiss ApoTome microscope with  
321 Zeiss Axiovision software.

322

### 323 **Flow sorting and qRT-PCR analysis**

324 Multiple E14.5 *Neurog3*<sup>P2A.FUCCI+</sup> dorsal pancreata were pooled and dispersed into a single-cell  
325 suspension using Accumax (Sigma) (protocol available on request). Dispersed samples were  
326 washed and incubated on ice, first with Muc1 antibody for 1 hr, then anti-hamster Cy5  
327 secondary antibody for an additional hour. DAPI was added to ensure sorting of viable cells.  
328 Flow sorting used a BD FACSAria III. cDNA was generated using iScript cDNA synthesis kit (Bio-  
329 Rad) from RNA isolated from flow-sorted cells after TRIzol extraction. PCR was performed in a  
330 Bio-Rad CFX96 with SsoFast EvaGreen Supermix (Bio-Rad) using at least three technical  
331 replicates. Relative expression level (normalized to *Gapdh*) was calculated by first assessing the  
332  $\Delta C_T$  between the gene of interest and *Gapdh* before converting the  $\Delta C_T$  to relative expression  
333 level ( $2^{\Delta C_T}$ ). The results in Figure 4 were independently repeated (biological replicate) with  
334 similar results. Primer sequences, except for *Insm1* primers (Applied Biosystems), are listed in  
335 Supplemental Table 1.

336

### 337 **Quantification and statistics**

338 Cell counting and fluorescence intensity quantifications were done using NIH ImageJ software.  
339 For quantifications “n” indicates total cells counted, with “N” number of individual dorsal  
340 pancreata analyzed. As previously stated approximately 33% of an entire dorsal pancreas was  
341 analyzed for each dorsal pancreas. Previous reports indicate that only 2% of the total pancreas  
342 volume needs to be systematically sampled and analyzed to obtain a relative error of  $\leq 10\%$   
343 (**23**). Error bars generated using standard error of the mean (SEM), with Student’s t-test (one-  
344 tailed) used to calculate *p* values. *p* values were deemed significant when  $\leq 0.05$ .

345

346 **Acknowledgements**

347 We thank Atsushi Miyawaki (RIKEN Brain Science Institute) for the mKO2-hCdt1<sup>(30/120)</sup>/pCSII-EF-  
348 MCS and mVenus-hGem<sup>(1/110)</sup>/pCSII-EF-MCS plasmids. This work utilized the Cell Imaging Shared  
349 Resource and Transgenic/ES Cell Shared Resource core facilities of the Vanderbilt Diabetes  
350 Research and Training Center funded by NIDDK grant 020593. Flow cytometry was performed  
351 in the VUMC Flow Cytometry Shared Resource supported by the Vanderbilt-Ingram Cancer  
352 Center (P30 CA68485) and the Vanderbilt Digestive Disease Research Center (DK0558404).  
353 Generation of *Neurog3*<sup>RG2</sup> and *Neurog3*<sup>P2A.FUCCI</sup> mice was supported in part by the Beta Cell  
354 Biology Consortium Mouse ES Cell Core funded by the NIDDK (U01DK072473). We thank Anna  
355 Means, Guoqiang Gu, and members of the Wright/Gu labs for discussions. This study was  
356 supported by the NIH/NIDDK (U01DK089570) and an American Heart Association fellowship to  
357 MB (13POST14240011).

358

359 **Competing Interests**

360 The authors declare that no competing interests exist.

361

362

## 363 References

- 364 1. **Gradwohl G, Dierich A, LeMeur M, Guillemot F.** 2000. Neurogenin3 Is Required for the  
365 Development of the Four Endocrine Cell Lineages of the Pancreas. *Proc Natl Acad Sci U S*  
366 *A* **97**:1607–1611.
- 367 2. **McGrath PS, Watson CL, Ingram C, Helmrath MA, Wells JM.** 2015. The Basic Helix-Loop-  
368 Helix Transcription Factor NEUROG3 Is Required for Development of the Human  
369 Endocrine Pancreas. *Diabetes* **64**:2497–505.
- 370 3. **Miyatsuka T, Kosaka Y, Kim H, German MS.** 2011. Neurogenin3 inhibits proliferation in  
371 endocrine progenitors by inducing Cdkn1a. *Proc Natl Acad Sci* **108**:185–190.
- 372 4. **Wang S, Yan J, Anderson DA, Xu Y, Kanal MC, Cao Z, Wright CVE, Gu G.** 2010. Neurog3  
373 gene dosage regulates allocation of endocrine and exocrine cell fates in the developing  
374 mouse pancreas. *Dev Biol* **339**:26–37.
- 375 5. **Johansson KA, Dursun U, Jordan N, Gu G, Beermann F, Gradwohl G, Grapin-Botton A.**  
376 2007. Temporal Control of Neurogenin3 Activity in Pancreas Progenitors Reveals  
377 Competence Windows for the Generation of Different Endocrine Cell Types. *Dev Cell*  
378 **12**:457–465.
- 379 6. **Bechard ME, Bankaitis ED, Hipkens SB, Ustione A, Piston DW, Yang Y-P, Magnuson MA,**  
380 **Wright CVE.** 2016. Precommitment low-level Neurog3 expression defines a long-lived  
381 mitotic endocrine-biased progenitor pool that drives production of endocrine-committed  
382 cells. *Genes Dev* **30**:1852–1865.
- 383 7. **Bankaitis ED, Bechard ME, Wright CVE.** 2015. Feedback control of growth,  
384 differentiation, and morphogenesis of pancreatic endocrine progenitors in an epithelial  
385 plexus niche. *Genes Dev* **29**:2203–2216.
- 386 8. **Roybon L, Hjalt T, Stott S, Guillemot F, Li J-Y, Brundin P.** 2009. Neurogenin2 directs  
387 granule neuroblast production and amplification while NeuroD1 specifies neuronal fate  
388 during hippocampal neurogenesis. *PLoS One* **4**:e4779.
- 389 9. **Shimojo H, Ohtsuka T, Kageyama R.** 2011. Dynamic Expression of Notch Signaling Genes  
390 in Neural Stem/Progenitor Cells. *Front Neurosci* **5**:1–7.
- 391 10. **Ali F, Hindley C, McDowell G, Deibler R, Jones A, Kirschner M, Guillemot F, Philpott A.**  
392 2011. Cell cycle-regulated multi-site phosphorylation of Neurogenin 2 coordinates cell  
393 cycling with differentiation during neurogenesis. *Development* **138**:4267–4277.
- 394 11. **Florio M, Leto K, Muzio L, Tinterri A, Badaloni A, Croci L, Zordan P, Barili V, Albieri I,**  
395 **Guillemot F, Rossi F, Consalez GG.** 2012. Neurogenin 2 regulates progenitor cell-cycle  
396 progression and Purkinje cell dendritogenesis in cerebellar development. *Development*  
397 **139**:2308–2320.
- 398 12. **Hindley C, Ali F, McDowell G, Cheng K, Jones A, Guillemot F, Philpott A.** 2012. Post-



- 399 translational modification of Ngn2 differentially affects transcription of distinct targets to  
400 regulate the balance between progenitor maintenance and differentiation. *Development*  
401 **139**:1718–1723.
- 402 13. **Bechard ME, Wright CVE.** 2017. New ideas connecting the cell cycle and pancreatic  
403 endocrine-lineage specification. *Cell Cycle* **16**:301–303.
- 404 14. **Krentz NAJ, van Hoof D, Li Z, Watanabe A, Tang M, Nian C, German MS, Lynn FC.** 2017.  
405 Phosphorylation of NEUROG3 Links Endocrine Differentiation to the Cell Cycle in  
406 Pancreatic Progenitors. *Dev Cell* **41**:129–142.
- 407 15. **Azzarelli R, Hurley C, Sznurkowska MK, Rulands S, Hardwick L, Gamper I, Ali F,**  
408 **McCracken L, Hindley C, McDuff F, Nestorowa S, Kemp R, Jones K, Göttgens B, Huch M,**  
409 **Evan G, Simons BD, Winton D, Philpott A.** 2017. Multi-site Neurogenin3 Phosphorylation  
410 Controls Pancreatic Endocrine Differentiation. *Dev Cell* **274**–286.
- 411 16. **Sakaue-Sawano A, Kurokawa H, Morimura T, Hanyu A, Hama H, Osawa H, Kashiwagi S,**  
412 **Fukami K, Miyata T, Miyoshi H, Imamura T, Ogawa M, Masai H, Miyawaki A.** 2008.  
413 Visualizing Spatiotemporal Dynamics of Multicellular Cell-Cycle Progression. *Cell*  
414 **132**:487–498.
- 415 17. **Chandler KJ, Chandler RL, Broeckelmann EM, Hou Y, Southard-Smith EM, Mortlock DP.**  
416 2007. Relevance of BAC transgene copy number in mice: Transgene copy number  
417 variation across multiple transgenic lines and correlations with transgene integrity and  
418 expression. *Mamm Genome* **18**:693–708.
- 419 18. **Abe T, Sakaue-Sawano A, Kiyonari H, Shioi G, Inoue K, Horiuchi T, Nakao K, Miyawaki A,**  
420 **Aizawa S, Fujimori T.** 2013. Visualization of cell cycle in mouse embryos with Fucci2  
421 reporter directed by Rosa26 promoter. *Development* **140**:237–246.
- 422 19. **Mellitzer G, Martín M, Sidhoum-Jenny M, Orvain C, Barths J, Seymour P a, Sander M,**  
423 **Gradwohl G.** 2004. Pancreatic islet progenitor cells in Neurogenin 3-yellow fluorescent  
424 protein knock-add-on mice. *Mol Endocrinol* **18**:2765–76.
- 425 20. **Huang HP, Liu M, El-Hodiri HM, Chu K, Jamrich M, Tsai MJ.** 2000. Regulation of the  
426 pancreatic islet-specific gene BETA2 (NeuroD) by Neurogenin 3. *Mol Cell Biol* **20**:3292–  
427 3307.
- 428 21. **Gasa R, Mrejen C, Lynn FC, Skewes-Cox P, Sanchez L, Yang KY, Lin CH, Gomis R, German**  
429 **MS.** 2008. Induction of pancreatic islet cell differentiation by the Neurogenin-NeuroD  
430 cascade. *Differentiation* **76**:381–391.
- 431 22. **Horton RM, Cai Z, Ho SN, Pease LR.** 2013. Gene splicing by overlap extension: Tailor-  
432 made genes using the polymerase chain reaction. *Biotechniques* **54**:528–535.
- 433 23. **Chintinne M, Stangé G, Denys B, In 'T Veld P, Hellemans K, Pipeleers-Marichal M, Ling**  
434 **Z, Pipeleers D.** 2010. Contribution of postnatally formed small beta cell aggregates to  
435 functional beta cell mass in adult rat pancreas. *Diabetologia* **53**:2380–2388.
